# Supplementary material
Source: PubMed Central journal article supplement (PMC3014637)

**A**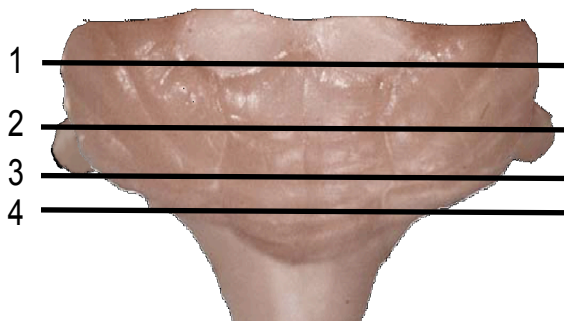**B**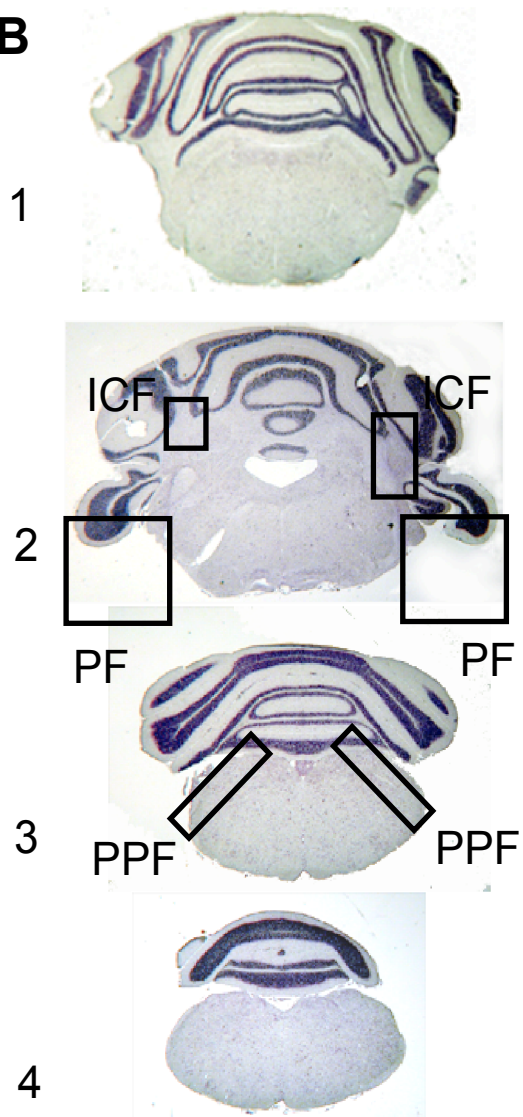

Supplement: supp_138.3.519_DEV051912FigS1.pdf [file supp_138.3.519_DEV051912FigS1.pdf]

**anti-fc**

**anti-L1**

**Merge**

**F3-fc**

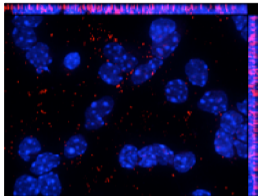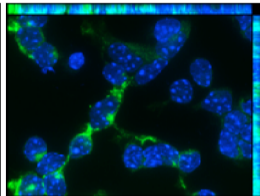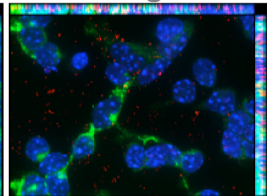

**TAG-fc**

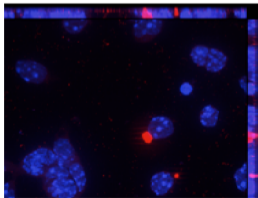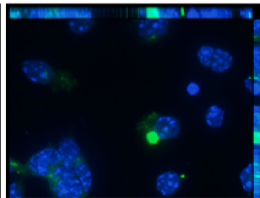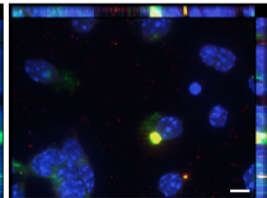

Supplement: supp_138.3.519_DEV051912FigS4.pdf [file supp_138.3.519_DEV051912FigS4.pdf]
